# Supplementary material
Source: HighWire-hosted journal article supplement (https://rapm.bmj.com/highwire/filestream/24339/field_highwire_adjunct_files/0/rapm-2023-105024supp001_data_supplement.pdf)
Supplement: rapm-2023-105024supp001_data_supplement.pdf [file rapm-2023-105024supp001_data_supplement.pdf]

**SUPPLEMENTARY TABLE 1: THE SEARCH STRING****Ovid MEDLINE(R) ALL**

- #1: Cleft Palate/su
- #2: (((cleft adj3 palat\*) and (surg\* or repair\*)) or palatoplast\*).ti,ab,kf.
- #3: #1 or #2
- #4: exp Pain/ or Pain Management/ or exp Analgesia/ or exp Anesthesia/ or Pain Measurement/ or Visual Analog Scale/
- #5: (pain\* or ((peripheral or nerve) adj block\*) or analges\* or anesthet\* or anaesthet\* or "visual analog scale\*" or "visual analogue scale\*" or VAS or "visual rating scale\*" or VRS or "face legs activity cry consolability" or flacc).ti,ab,kf.
- #6: #4 or #5
- #7: #3 and #6
- Time frame: May 4, 2022 - August 29, 2023

**Embase Classic+Embase**

- #1: Cleft Palate/su
- #2: (((cleft adj3 palat\*) and (surg\* or repair\*)) or palatoplast\*).ti,ab,kf.
- #3: #1 or #2
- #4: exp pain/ or exp analgesia/ or exp anesthesia/ or exp pain assessment/
- #5: (pain\* or ((peripheral or nerve) adj block\*) or analges\* or anesthet\* or anaesthet\* or "visual analog scale\*" or "visual analogue scale\*" or VAS or "visual rating scale\*" or VRS or "face legs activity cry consolability" or flacc).ti,ab,kf.
- #6: #4 or #5
- #7: #3 and #6
- Time frame: May 4, 2022 - August 29, 2023

**Cochrane Database of Systematic Reviews and Cochrane Central Register of Controlled Trials**

- #1 [mh ^"Cleft Palate"/su]
- #2 (((cleft NEAR/3 palat\*) AND (surg\* OR repair\*))OR palatoplast\*):ti,ab,kw
- #3 #1 OR #2
- #4 [mh "Pain"] OR [mh ^"Pain Management"] OR [mh "Analgesia"] OR [mh "Anesthesia"] OR [mh ^"Pain Measurement"] OR [mh ^"Visual Analog Scale"]
- #5 (pain\* OR ((peripheral OR nerve) NEXT block\*) OR analges\* OR anesthet\* OR anaesthet\* OR (visual NEXT analog\* NEXT scale\*) OR VAS OR (visual NEXT rating NEXT scale\*) OR VRS OR "face legs

activity cry consolability" OR flacc):ti,ab,kw

#6 #4 OR #5

#7 #3 AND #6 in Cochrane Reviews, Cochrane Protocols

#8 #3 AND #6

Time frame: May 4, 2022 - August 29, 2023

---
